# Supplementary material for: The Reference Elevation Model of Antarctica
Source: Copernicus journal article supplement (doi:10.5194/tc-13-665-2019), 2019-02-26
Supplement: Supplementary file 1 [file tc-13-665-2019-supplement.zip]

Archive with 16 entries (15 files):
- tc-13-665-2019-supplement-title-page.pdf
- SIImages/
- SIImages/.DS_Store
- SIImages/figureS8.jpg
- SIImages/figureS6.jpeg
- SIImages/figureS3_notAnnotated.jpg
- SIImages/figureS9.jpg
- SIImages/figureS1.jpg
- SIImages/figureS4.jpg
- SIImages/figureS7_notAnnotated.tif
- SIImages/figureS7.jpeg
- SIImages/figureS2.jpg
- SIImages/figureS3.jpg
- SIImages/SupplementalFigures.pdf
- SIImages/figureS6_notAnnotated.tif
- SIImages/figureS5.jpg
