# Supplementary material for: The Reference Elevation Model of Antarctica
Source: Copernicus journal article supplement (doi:10.5194/tc-13-665-2019), 2019-02-26
Supplement: Supplementary file 1 [file tc-13-665-2019-supplement.zip › tc-13-665-2019-supplement-title-page.pdf]

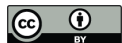

## *Supplement of*

# **The Reference Elevation Model of Antarctica**

**Ian M. Howat et al.**

*Correspondence to:* Ian M. Howat (ihowat@gmail.com)

- tc-13-665-2019-supplement-title-page.pdf
- SIImages
  - .DS\_Store
  - SupplementalFigures.pdf
  - figureS1.jpg
  - figureS2.jpg
  - figureS3.jpg
  - figureS3\_notAnnotated.jpg
  - figureS4.jpg
  - figureS5.jpg
  - figureS6.jpeg
  - figureS6\_notAnnotated.tif
  - figureS7.jpeg
  - figureS7\_notAnnotated.tif
  - figureS8.jpg
  - figureS9.jpg

The copyright of individual parts of the supplement might differ from the CC BY 4.0 License.
