# Supplementary figures and images for: The Reference Elevation Model of Antarctica
Source: Copernicus journal article supplement (doi:10.5194/tc-13-665-2019), 2019-02-26

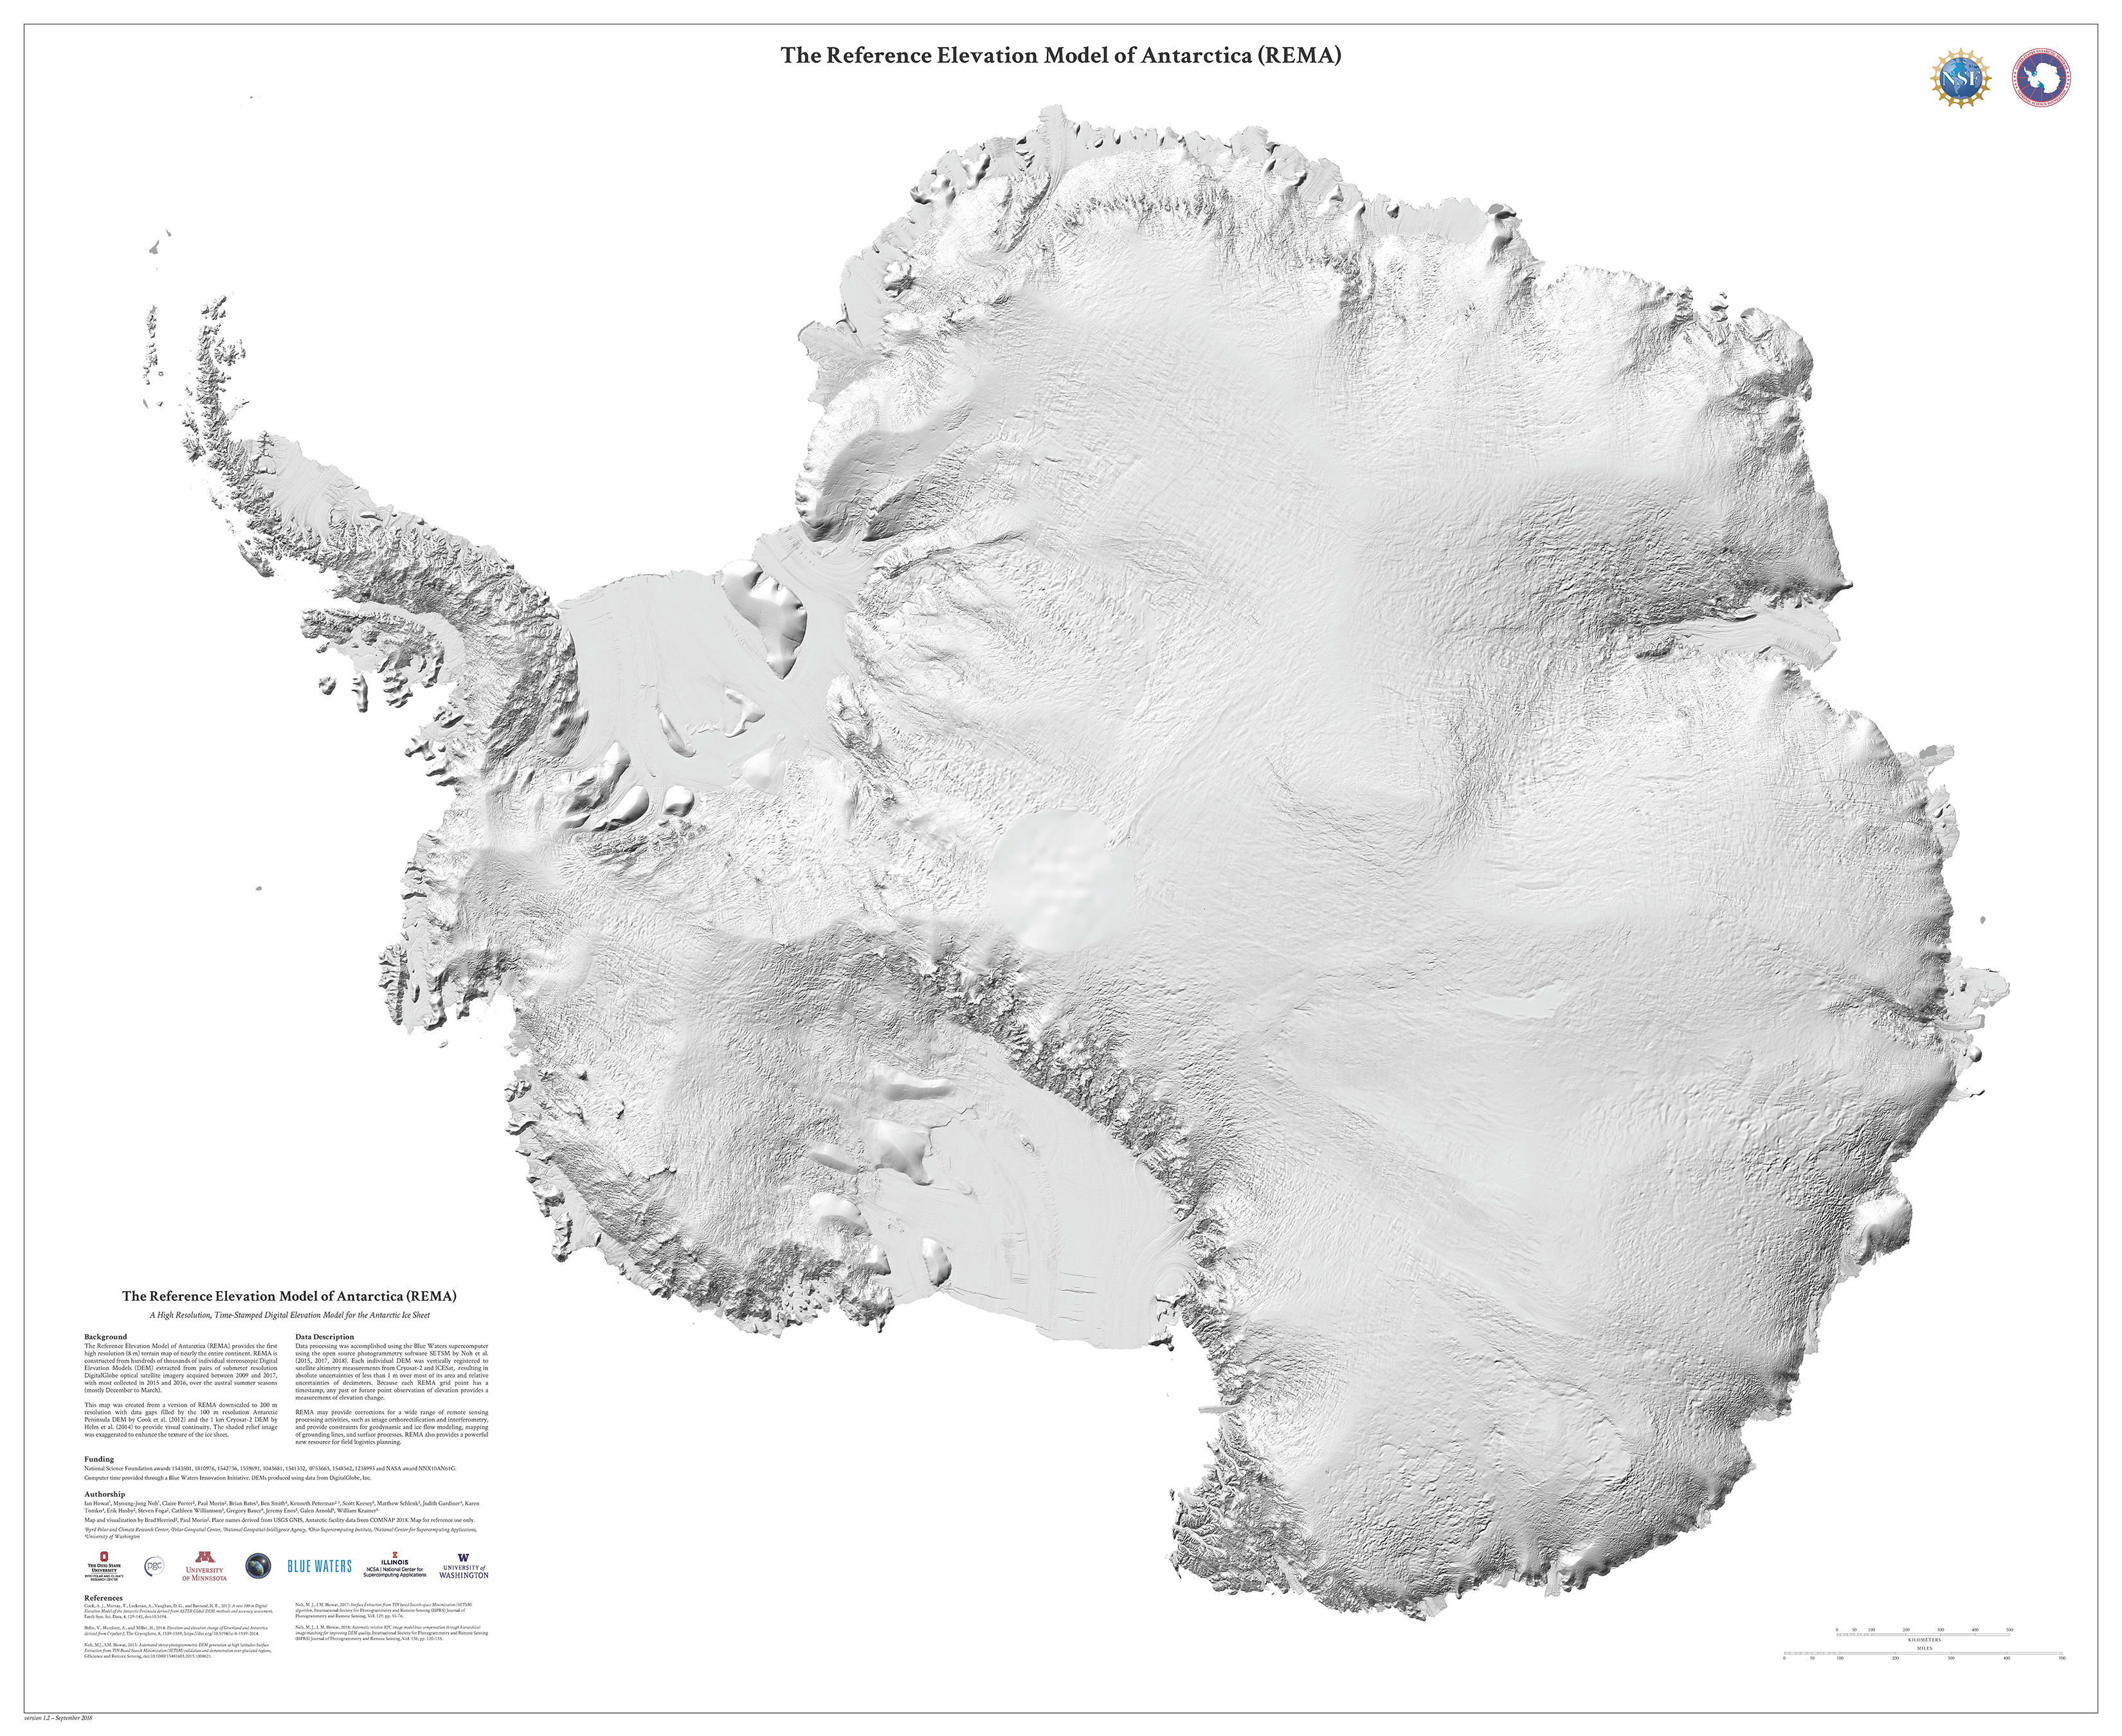

Supplement: Supplementary file 1 [file tc-13-665-2019-supplement.zip › SIImages/figureS8.jpg]

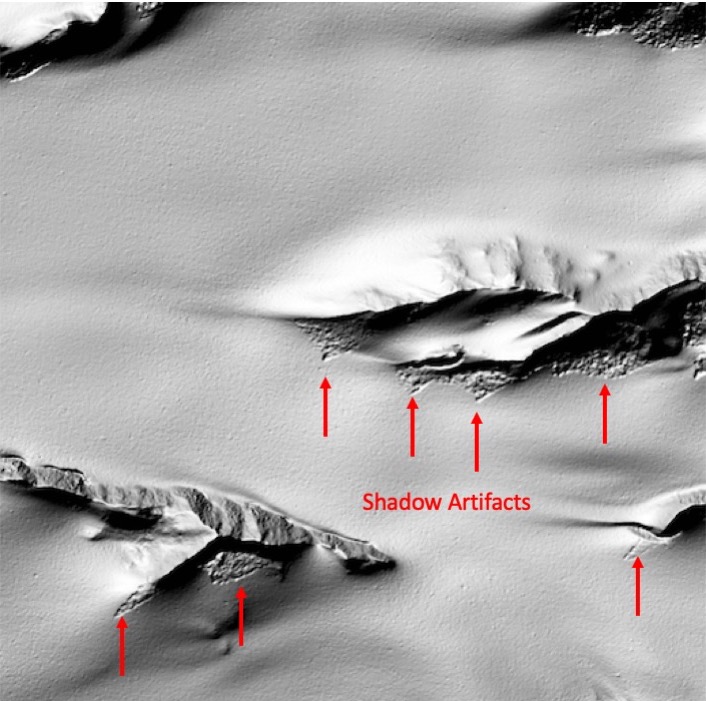

Supplement: Supplementary file 1 [file tc-13-665-2019-supplement.zip › SIImages/figureS6.jpeg]

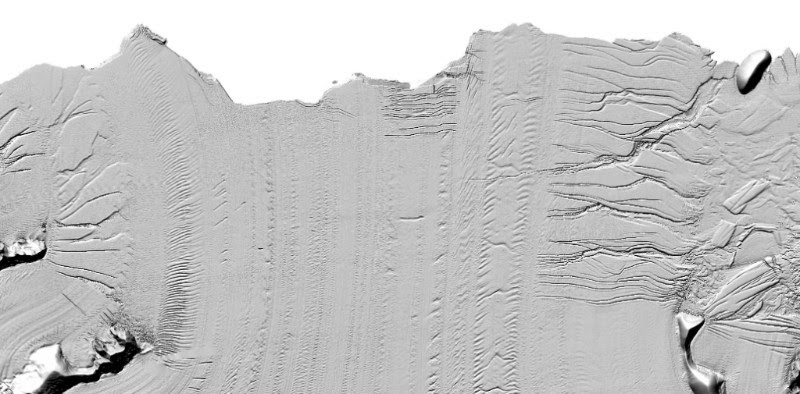

Supplement: Supplementary file 1 [file tc-13-665-2019-supplement.zip › SIImages/figureS3_notAnnotated.jpg]

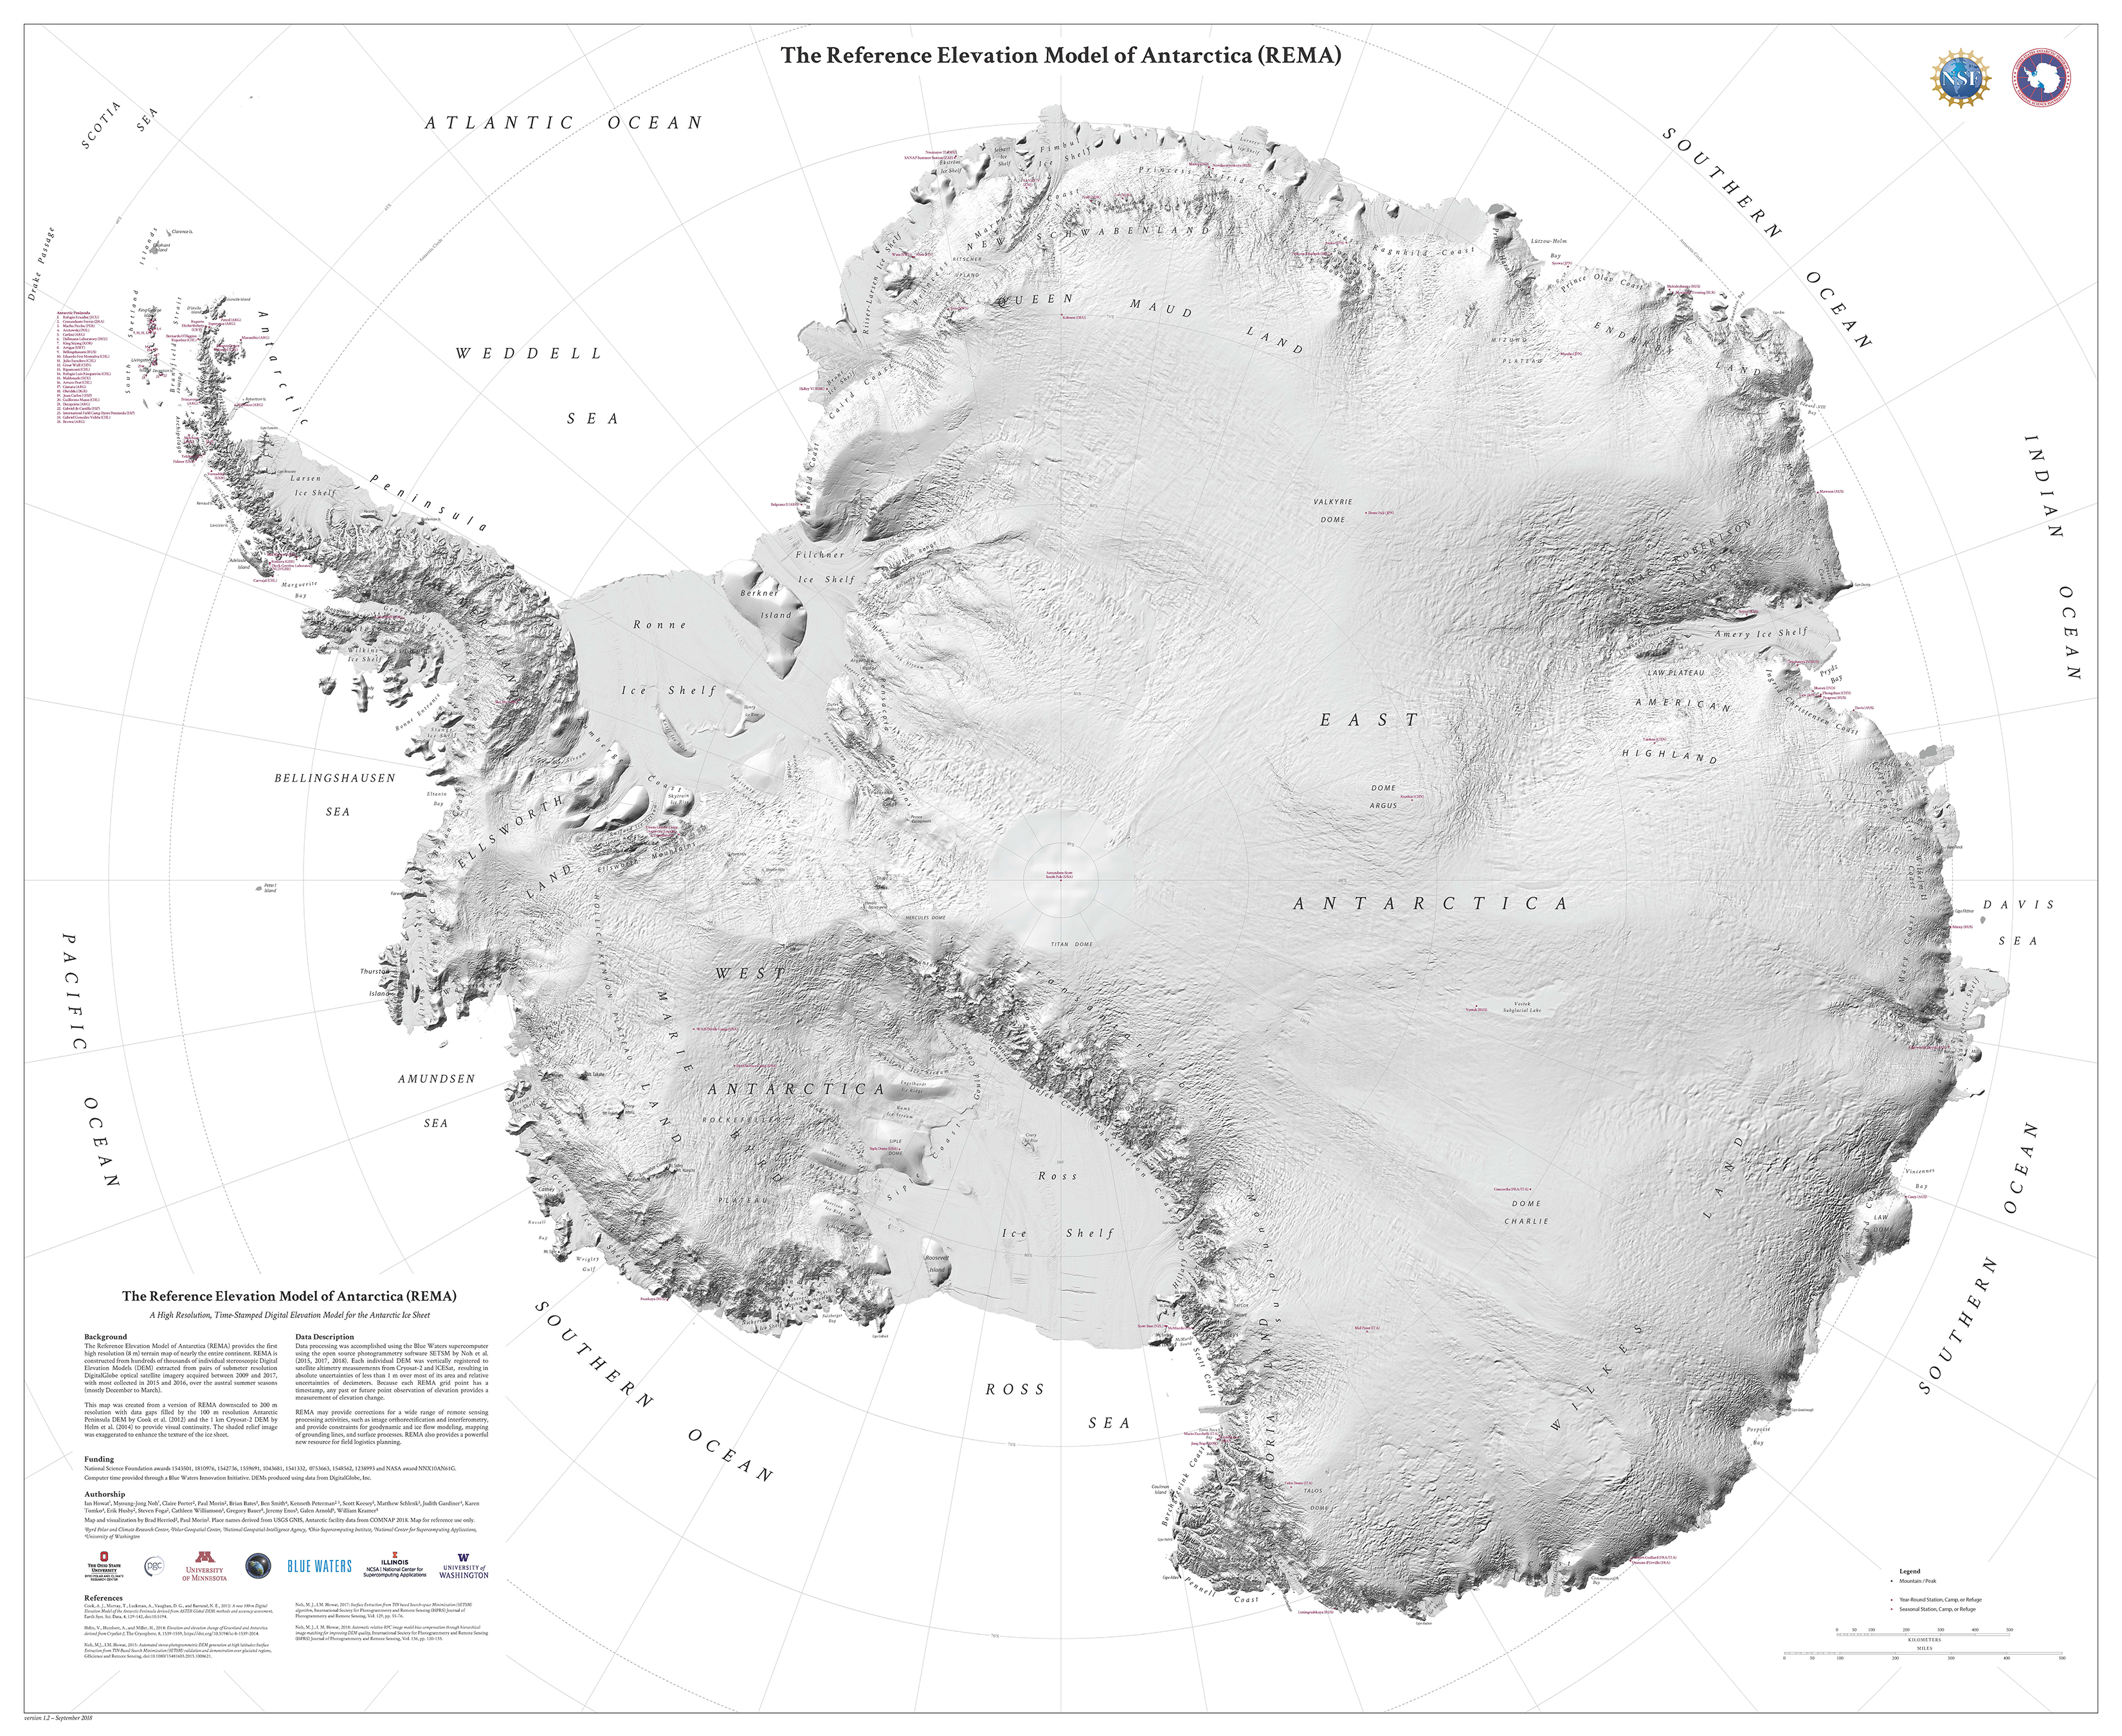

Supplement: Supplementary file 1 [file tc-13-665-2019-supplement.zip › SIImages/figureS9.jpg]

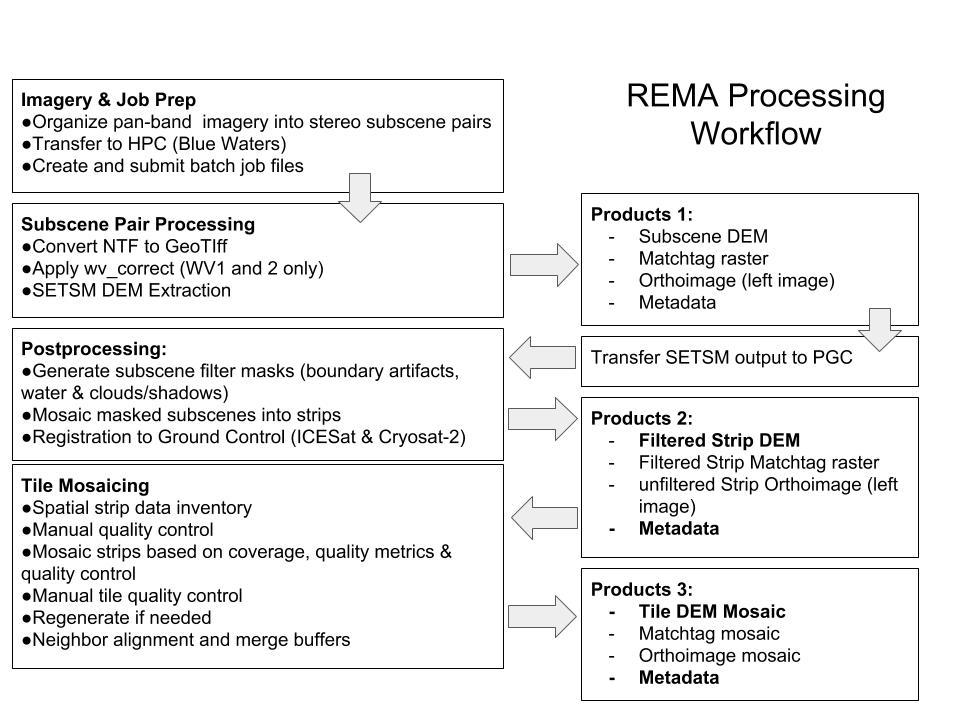

Supplement: Supplementary file 1 [file tc-13-665-2019-supplement.zip › SIImages/figureS1.jpg]

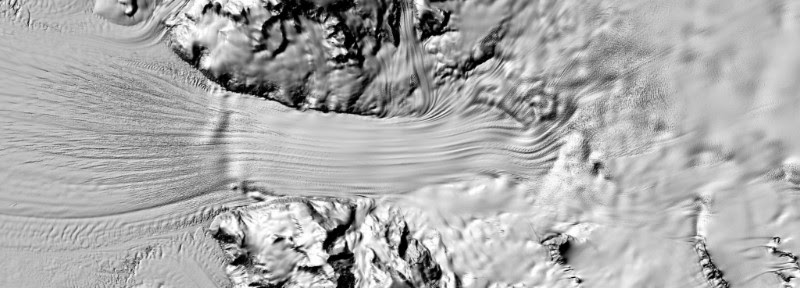

Supplement: Supplementary file 1 [file tc-13-665-2019-supplement.zip › SIImages/figureS4.jpg]

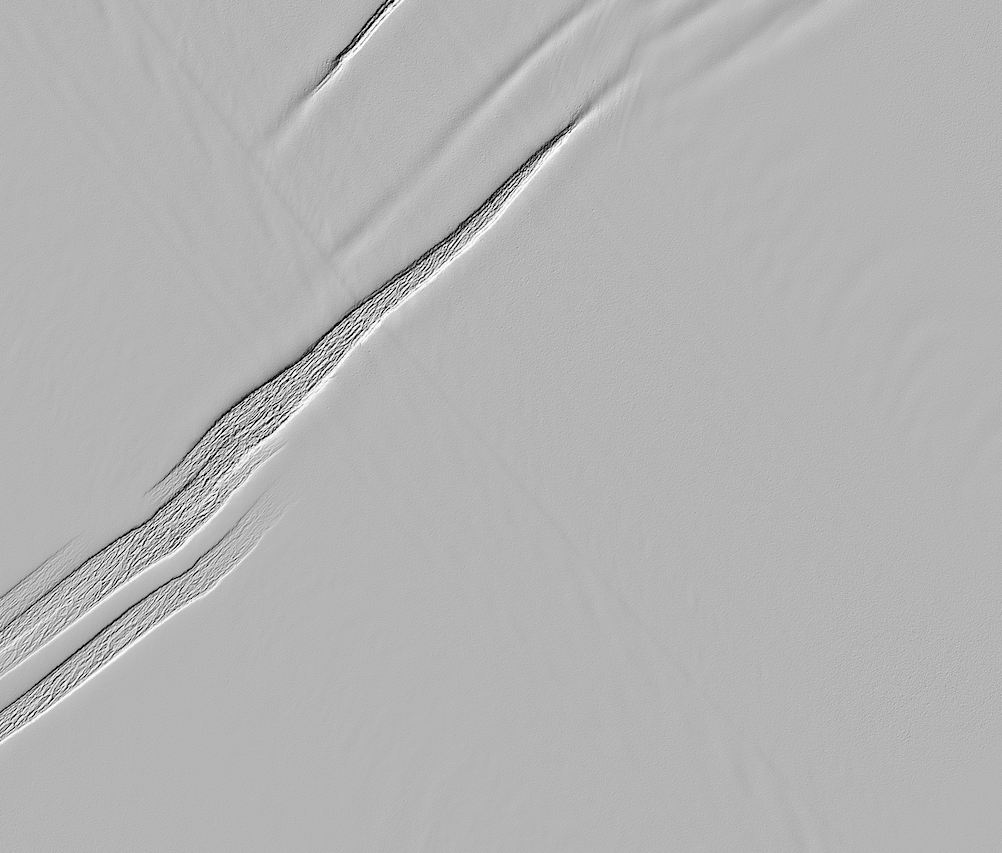

Supplement: Supplementary file 1 [file tc-13-665-2019-supplement.zip › SIImages/figureS7_notAnnotated.tif]

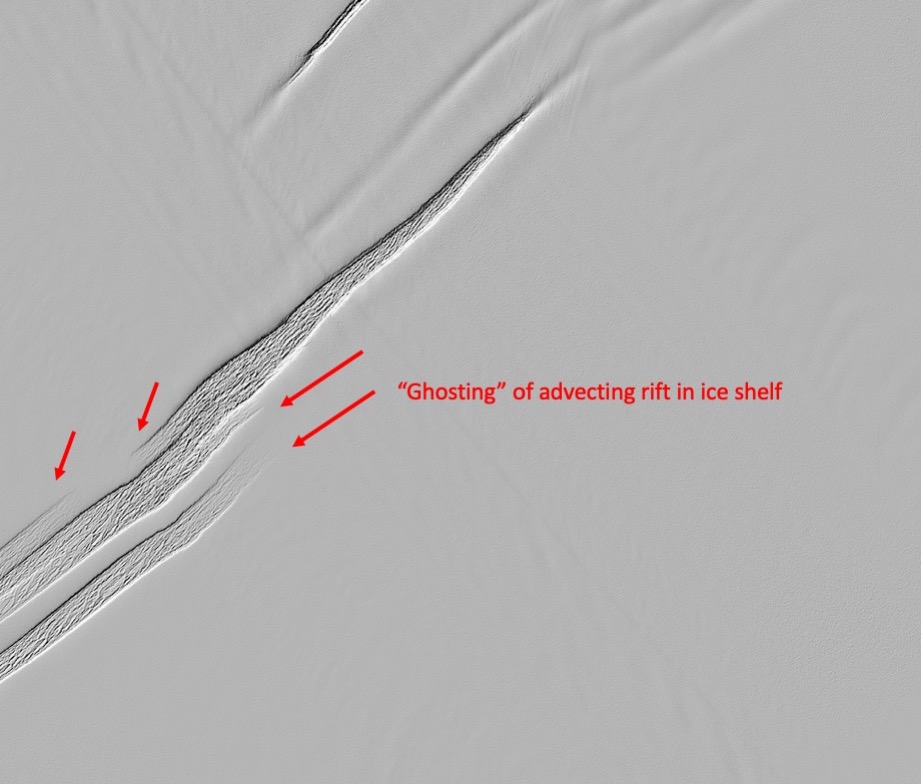

Supplement: Supplementary file 1 [file tc-13-665-2019-supplement.zip › SIImages/figureS7.jpeg]

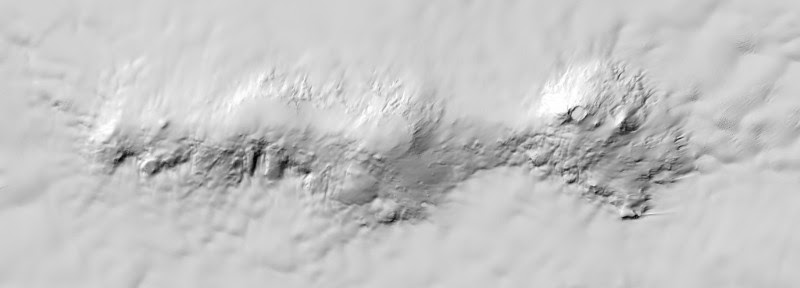

Supplement: Supplementary file 1 [file tc-13-665-2019-supplement.zip › SIImages/figureS2.jpg]

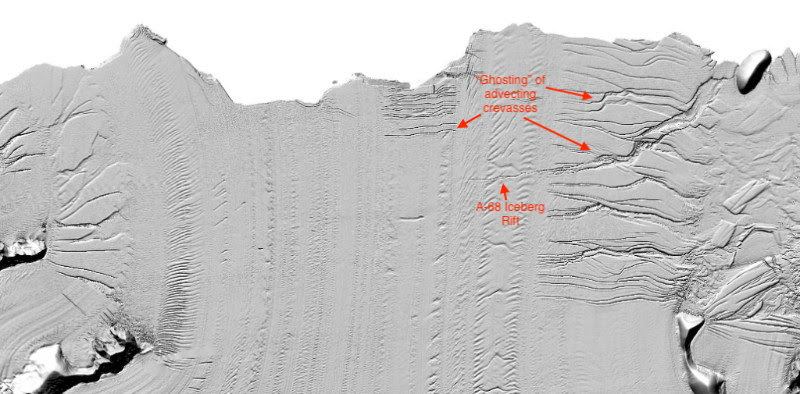

Supplement: Supplementary file 1 [file tc-13-665-2019-supplement.zip › SIImages/figureS3.jpg]

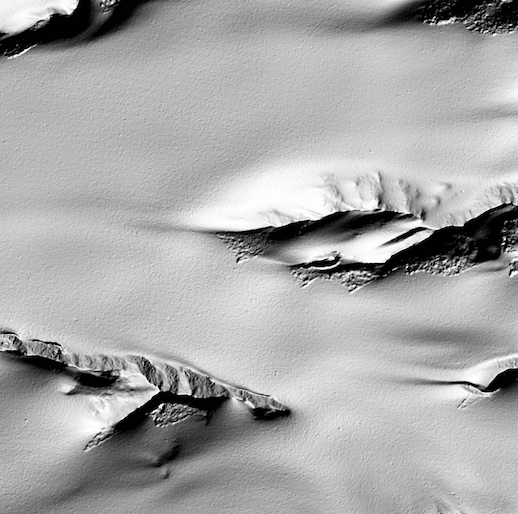

Supplement: Supplementary file 1 [file tc-13-665-2019-supplement.zip › SIImages/figureS6_notAnnotated.tif]

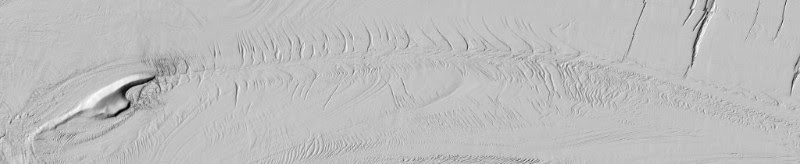

Supplement: Supplementary file 1 [file tc-13-665-2019-supplement.zip › SIImages/figureS5.jpg]
